# Supplementary material
Source: PubMed Central journal article supplement (PMC1380197)
Supplement: jamia_M1911v2_1.pdf [file jamia_M1911v2_1.pdf]

**Appendix B: Search Strategies for Outcome Identification.**

## Set 1

- (((("arthritis, rheumatoid"[MeSH Terms] OR RHEUMATOID ARTHRITIS[Text Word]) OR ("migraine"[MeSH Terms] OR MIGRAINE[Text Word])) OR ("breast neoplasms"[MeSH Terms] OR BREAST CANCER[Text Word])) AND (randomized controlled trial[Publication Type] OR ((randomized[Title/Abstract] AND controlled[Title/Abstract]) AND trial[Title/Abstract])) AND jsubsetaim[text] AND ("1999/1/1"[PDat] : "2004/1/1"[PDat]))

## Set 2

- ("tuberculosis, pulmonary"[MeSH Terms] OR pulmonary tuberculosis[Text Word]) AND hasabstract[text] AND Randomized Controlled Trial[ptyp] AND English[Lang] AND ("human"[MeSH Terms] OR "hominidae"[MeSH Terms]) AND ("1999/01/01"[PDAT] : "2004/01/01"[PDAT])
- ("hypertension, renal"[MeSH Terms] OR renal hypertension[Text Word]) AND hasabstract[text] AND Randomized Controlled Trial[ptyp] AND English[Lang] AND ("human"[MeSH Terms] OR "hominidae"[MeSH Terms]) AND ("1999/01/01"[PDAT] : "2004/01/01"[PDAT])
- ("asthma, exercise-induced"[MeSH Terms] OR asthma, exercise-induced[Text Word]) AND hasabstract[text] AND Randomized Controlled Trial[ptyp] AND English[Lang] AND ("human"[MeSH Terms] OR "hominidae"[MeSH Terms]) AND ("1999/01/01"[PDAT] : "2004/01/01"[PDAT])

## Set 3

- (immunizations[Text Word] OR immunisations[Text Word] OR "immunization"[MeSH Terms]) AND hasabstract[text] AND English[Lang] AND ("infant, newborn"[MeSH Terms] OR "child, preschool"[MeSH Terms] OR "infant"[MeSH Terms]) AND ("adverse effects"[Subheading] OR adverse effects[Text Word])

## Set 4

- (diabetes mellitus[Text Word] OR "diabetes mellitus"[MeSH Terms] OR diabetes insipidus[Text Word] OR "diabetes insipidus"[MeSH Terms] OR diabetes[Text Word]) AND hasabstract[text] AND English[Lang] AND ("human"[MeSH Terms] OR "hominidae"[MeSH Terms])

## Set 5

- "treatment outcome"[MeSH Terms] AND "loattrfree full text"[sb] AND hasabstract[text] AND Randomized Controlled Trial[ptyp] AND English[Lang] AND "humans"[MeSH Terms]
